# Supplementary material for: Development of suspension cell culture model to mimic circulating tumor cells
Source: PubMed Central journal article supplement (PMC5787494; doi:10.18632/oncotarget.23079), 2017-12-07
Supplement: oncotarget-09-622-s001.pdf [file oncotarget-09-622-s001.pdf]

## Development of suspension cell culture model to mimic circulating tumor cells

### SUPPLEMENTARY MATERIALS

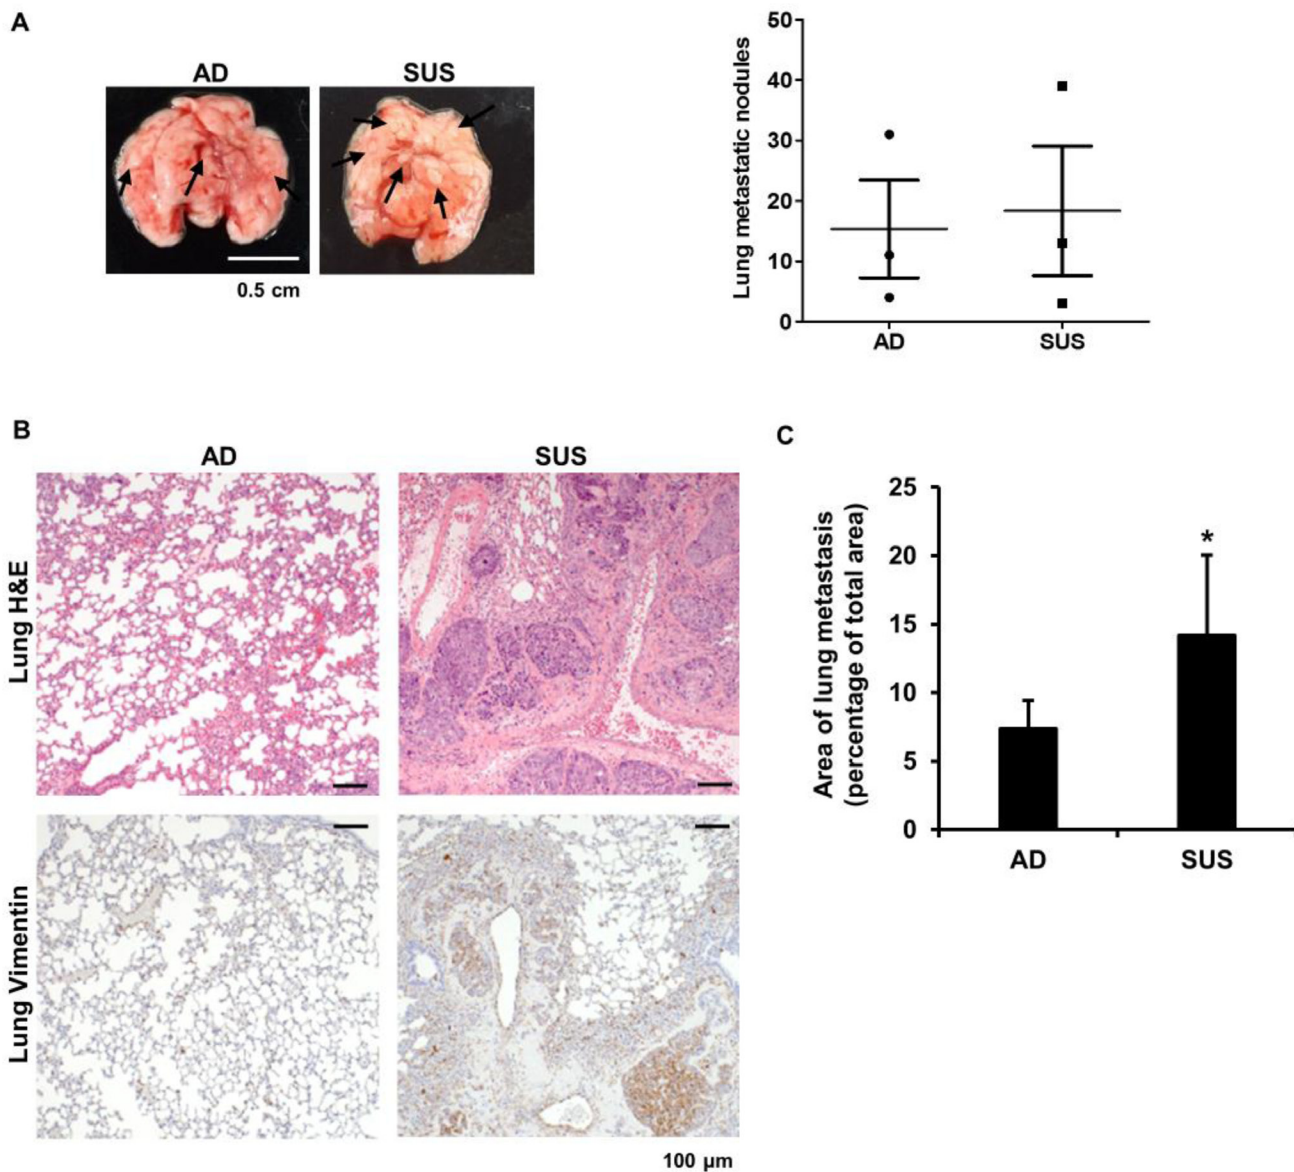

**Supplementary Figure 1: Suspension cells show higher metastatic area in lung colonization.** (A) MDA-MB-468 adherent or suspension cells were directly injected into the lateral tail vein of female NOD-scid-gamma (NSG) mice. Representative gross morphology of lungs at 10 weeks after tail-vein injection of adherent or suspension cells are shown. Arrows indicate metastatic nodules. Metastatic tumor nodules in the lung were counted and data are shown as means  $\pm$  SEM,  $n = 6$ . (B) Representative images of lung sections staining with vimentin in two groups of animals are shown (Scale bar = 100  $\mu$ m). (C) The percentage of micro-metastasis area in two groups are shown. \* $p < 0.05$ ; one-tailed Student's  $t$ -test.

**A**

NL: 9.32E4

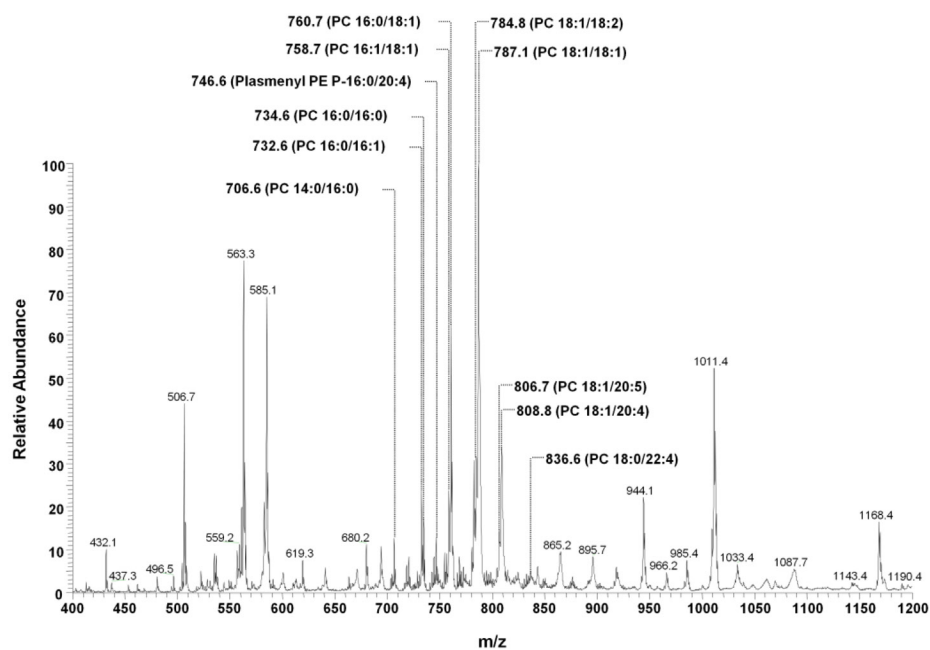**B**

NL: 3.95E4

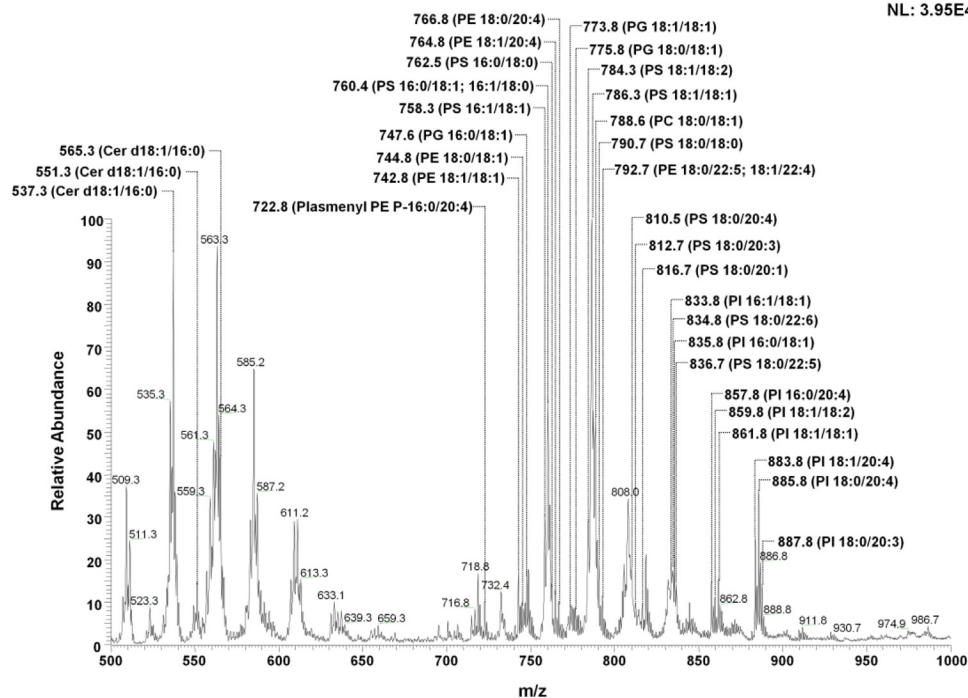

**Supplementary Figure 2:** Representative spectra of lipid profiles from lipid extracts of MDA-MB-468 cells derived from nanoESI-MS in (A) positive-ion mode and (B) negative-ion mode. Cer, ceramide; PC, phosphatidylcholine; PE, phosphatidylethanolamine; PG, phosphatidylglycerol; PS, phosphatidylserine; PI, phosphatidylinositol;  $m/z$ , mass-to-charge ratio; NL, normalized intensity level.

**Supplementary Table 1: Lipid species identified from lipid extracts of adherent and suspension MDA-MB-468 cells using nanoESI-tandem MS analyses.** See Supplementary\_Table\_1

**Supplementary Table 2: Commonly up- and down-regulated genes between suspension MDA-MB-468 cells and patient CTCs.** See Supplementary\_Table\_2
